# Supplementary material
Source: Springer Nature journal article supplement (https://www.springermedizin.de/resource/supplementary/12879_2003_74_MOESM10_ESM.pdf/9448094)

Number of cases

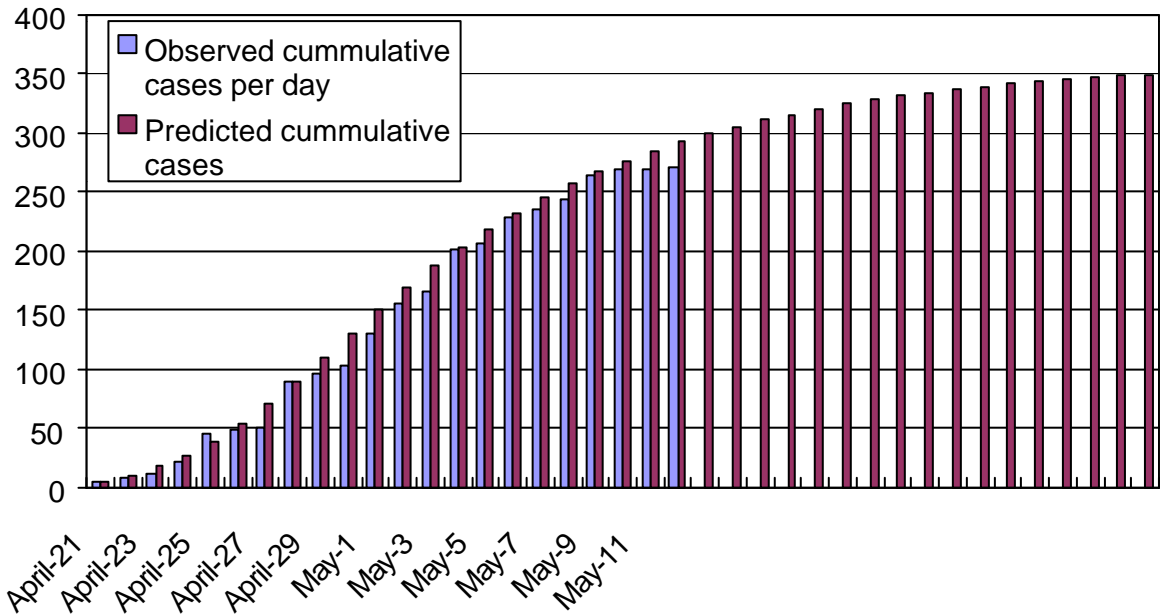

Supplement: MOESM10 [file 9448094]
